# Supplementary material for: Towards a new type of heterometallic system based on a paddle-wheel Ru2 dimer: first results derived from the use of a high spin diruthenium(iii,iii) building block
Source: Royal Society of Chemistry journal article supplement (doi:10.1039/c7qi00154a), 2017-01-01
Supplement: c7qi00154a1.pdf [file c7qi00154a1.pdf]

## Electronic Supporting Information (ESI)

### Toward a new type of heterometallic systems based on paddle-wheel Ru<sub>2</sub> dimer: first results derived from the use of high spin diruthenium(III,III) buiding block

Bing-Bing Yang, Li-Na Feng, Xiao-Meng Fan, Kai-Xiang Zhang, Jian-Hui Yang\* and Bin Liu\*

*Key Laboratory of Synthetic and Natural Functional Molecule Chemistry of Ministry of Education, Shaanxi Key Laboratory of Physico-Inorganic Chemistry, College of Chemistry & Materials Science, Northwest University, Xi'an 710127, P. R. China.*

Table S1. Selected bond distances (Å) and angles (°) for compound **1**

| Selected bond distances (Å) |           |             |          |
|-----------------------------|-----------|-------------|----------|
| Ru(1)–Ru(1A)                | 2.3400(8) | Cu(1)–O(4)  | 1.944(4) |
| Ru(1)–O(1)                  | 1.988(4)  | Cu(1)–O(3B) | 1.920(4) |
| Ru(1)–O(5)                  | 1.978(4)  | Cu(1)–O(7C) | 1.980(4) |
| Ru(1)–O(2A)                 | 1.971(4)  | Cu(1)–O(8B) | 1.992(4) |
| Ru(1)–O(6A)                 | 1.977(4)  | Cu(1)–O(10) | 2.296(6) |
| Ru(1)–O(9)                  | 2.263(5)  |             |          |
| P(1)–O(1)                   | 1.560(4)  | P(2)–O(5)   | 1.569(5) |
| P(1)–O(2)                   | 1.558(4)  | P(2)–O(6)   | 1.572(4) |
| P(1)–O(3)                   | 1.519(4)  | P(2)–O(7)   | 1.518(4) |
| P(1)–O(4)                   | 1.515(4)  | P(2)–O(8)   | 1.509(5) |

  

| Selected bond angles (°) |           |                   |           |
|--------------------------|-----------|-------------------|-----------|
| Ru(1A)–Ru(1)–O(1)        | 91.58(11) | O(4)–Cu(1)–O(10)  | 96.4(2)   |
| Ru(1A)–Ru(1)–O(5)        | 93.23(12) | O(3B)–Cu(1)–O(10) | 93.54(19) |

|                    |            |                   |          |
|--------------------|------------|-------------------|----------|
| Ru(1A)–Ru(1)–O(2A) | 93.60(11)  | O(7C)–Cu(1)–O(10) | 99.5(2)  |
| Ru(1A)–Ru(1)–O(6A) | 91.42(11)  | O(8B)–Cu(1)–O(10) | 85.3(2)  |
| Ru(1A)–Ru(1)–O(9)  | 178.69(12) |                   |          |
| Ru(1)–O(1)–P(1)    | 123.8(2)   | Cu(1)–O(4)–P(1)   | 125.9(2) |
| Ru(1)–O(5)–P(2)    | 120.5(2)   | Cu(1D)–O(3)–P(1)  | 119.0(2) |
| Ru(1A)–O(2)–P(1)   | 122.9(2)   | Cu(1D)–O(8)–P(2)  | 141.6(3) |
| Ru(1A)–O(6)–P(2)   | 121.4(2)   | Cu(1E)–O(7)–P(2)  | 130.5(3) |

Symmetry codes: A -x, 1 - y, 2 - z; B 1/2 - x, -1/2 + y, 2/3 - z; C x, -1 + y, z; D 1/2 - x, 1/2 + y, 3/2 - z; E x, 1 + y, z;

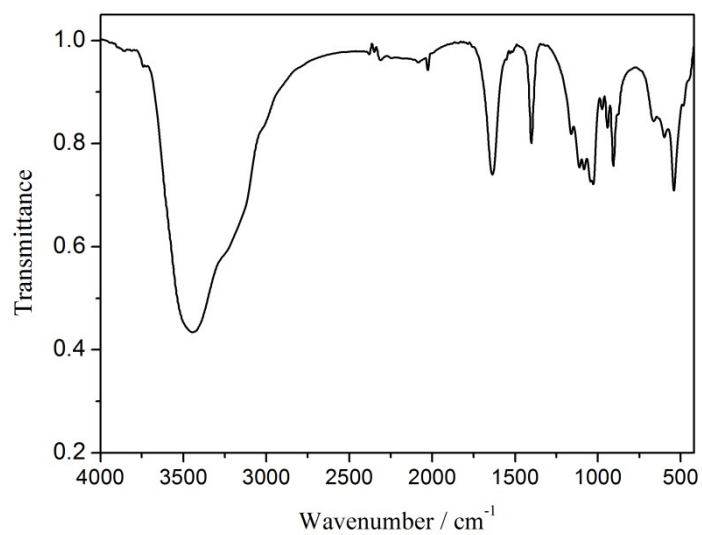

**Fig. S1** IR spectra of compound **1**.

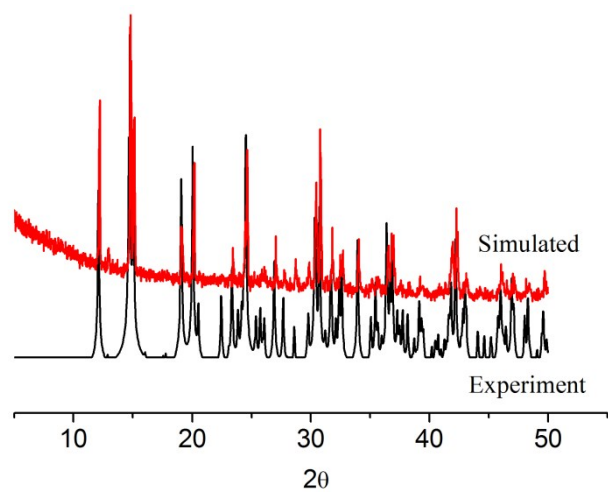

**Fig. S2** Comparison of XRPD patterns of the simulated pattern from the single-crystal structure determination and as-synthesized product of **1**.

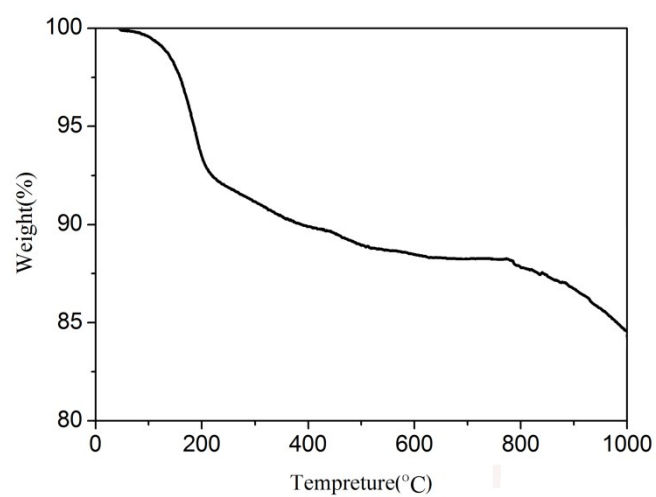

**Fig. S3** . TG curve of compound **1**

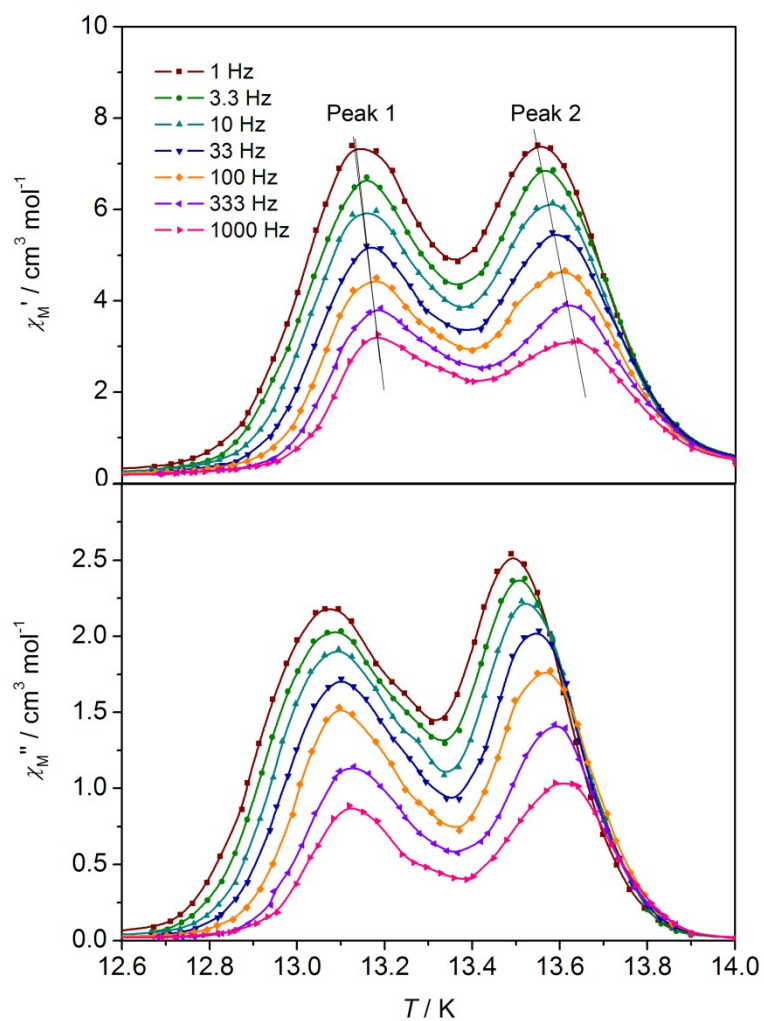

**Fig. S4**

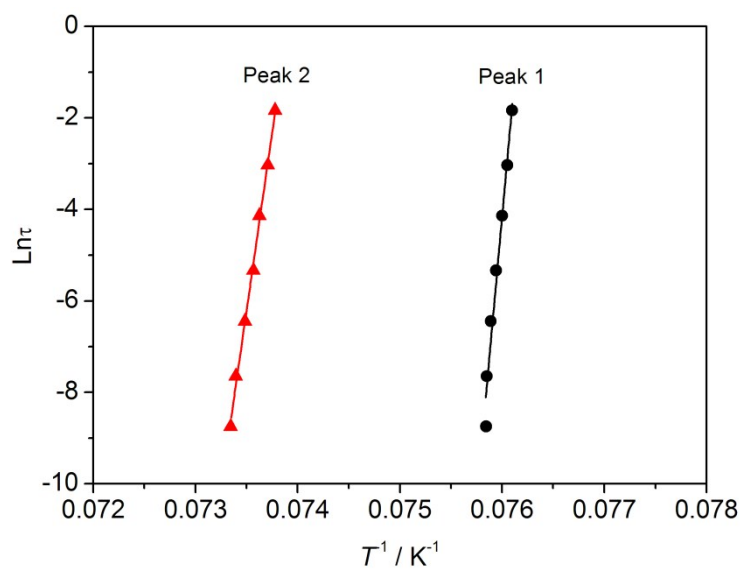

**Fig. S5** The frequency dependence of  $T_p$  on  $\chi_M'$  fitted in the Arrhenius law.

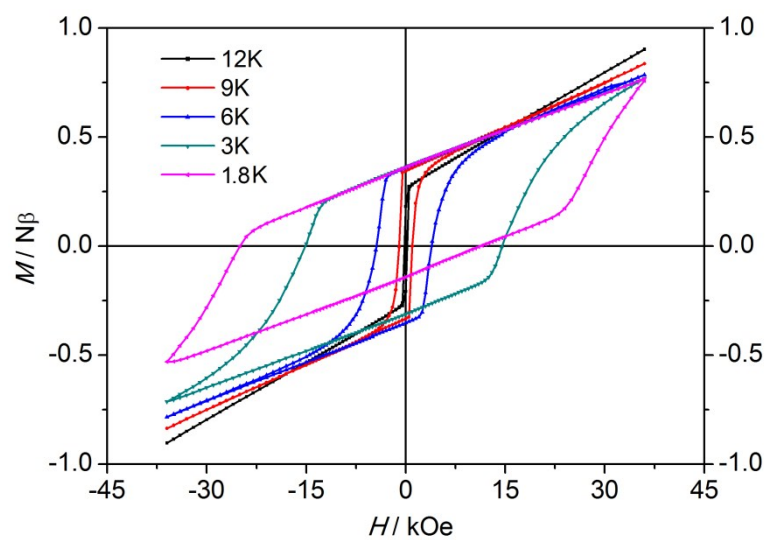

**Fig. S6**  $M$  vs  $H$  plots for compound **1**

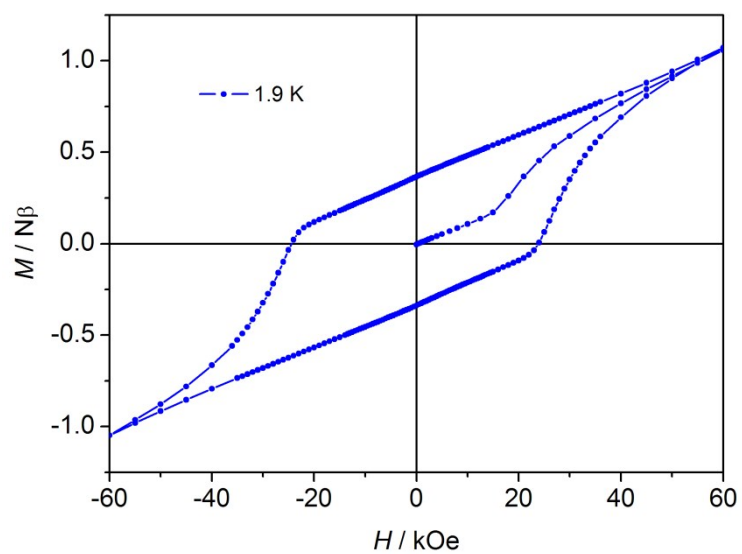

**Fig. S7** Magnetic hysteresis loop at 1.9 K for compound **1**

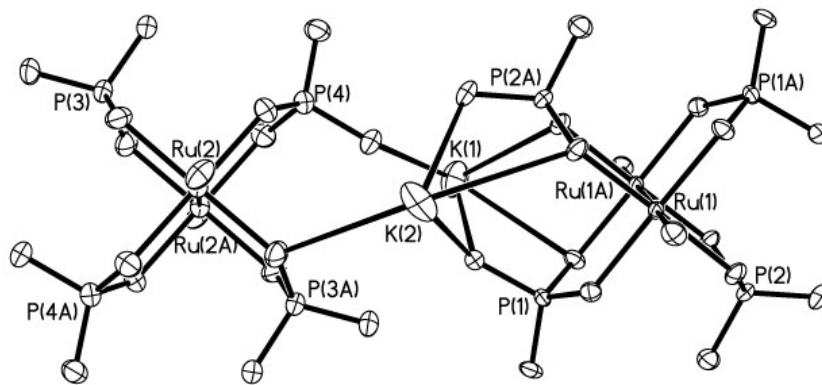

**Fig. S8** ORTEP representation (30% thermal probability ellipsoids) of the crystal structure of homo-valent compound  $\text{K}_2\text{Ru}_2(\text{HPO}_4)_4(\text{H}_2\text{O})_2$

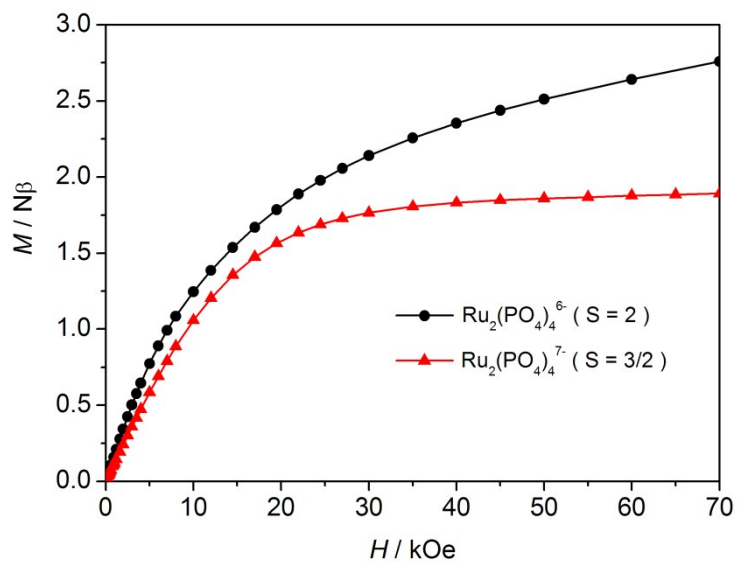

**Fig. S9** Plots of magnetization  $M$  (in  $N\beta$  units) vs.  $H$  for homo-valent and mixed-valent diruthenium phosphates.

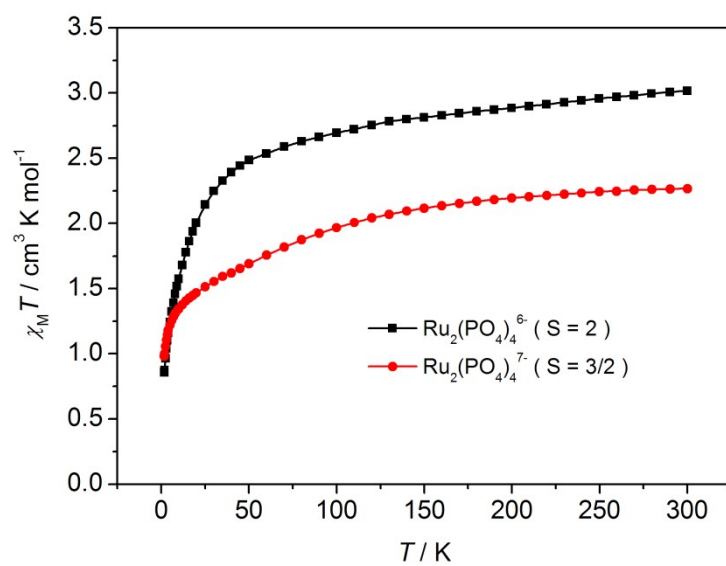

**Fig. S10** Plots of  $\chi_M T$  with respect to  $T$  for homo-valent and mixed-valent diruthenium phosphates.
